# Supplementary material for: Lipid Nanoparticle-Mediated Delivery of mRNA Into the Mouse and Human Retina and Other Ocular Tissues
Source: PubMed Central journal article supplement — Transl Vis Sci Technol. 2024 Jul 9;13(7):7. doi: 10.1167/tvst.13.7.7 (PMC11235142; doi:10.1167/tvst.13.7.7), 2024-07-09
Supplement: tvst-13-7-7_s001.pdf [file tvst-13-7-7_s001.pdf]

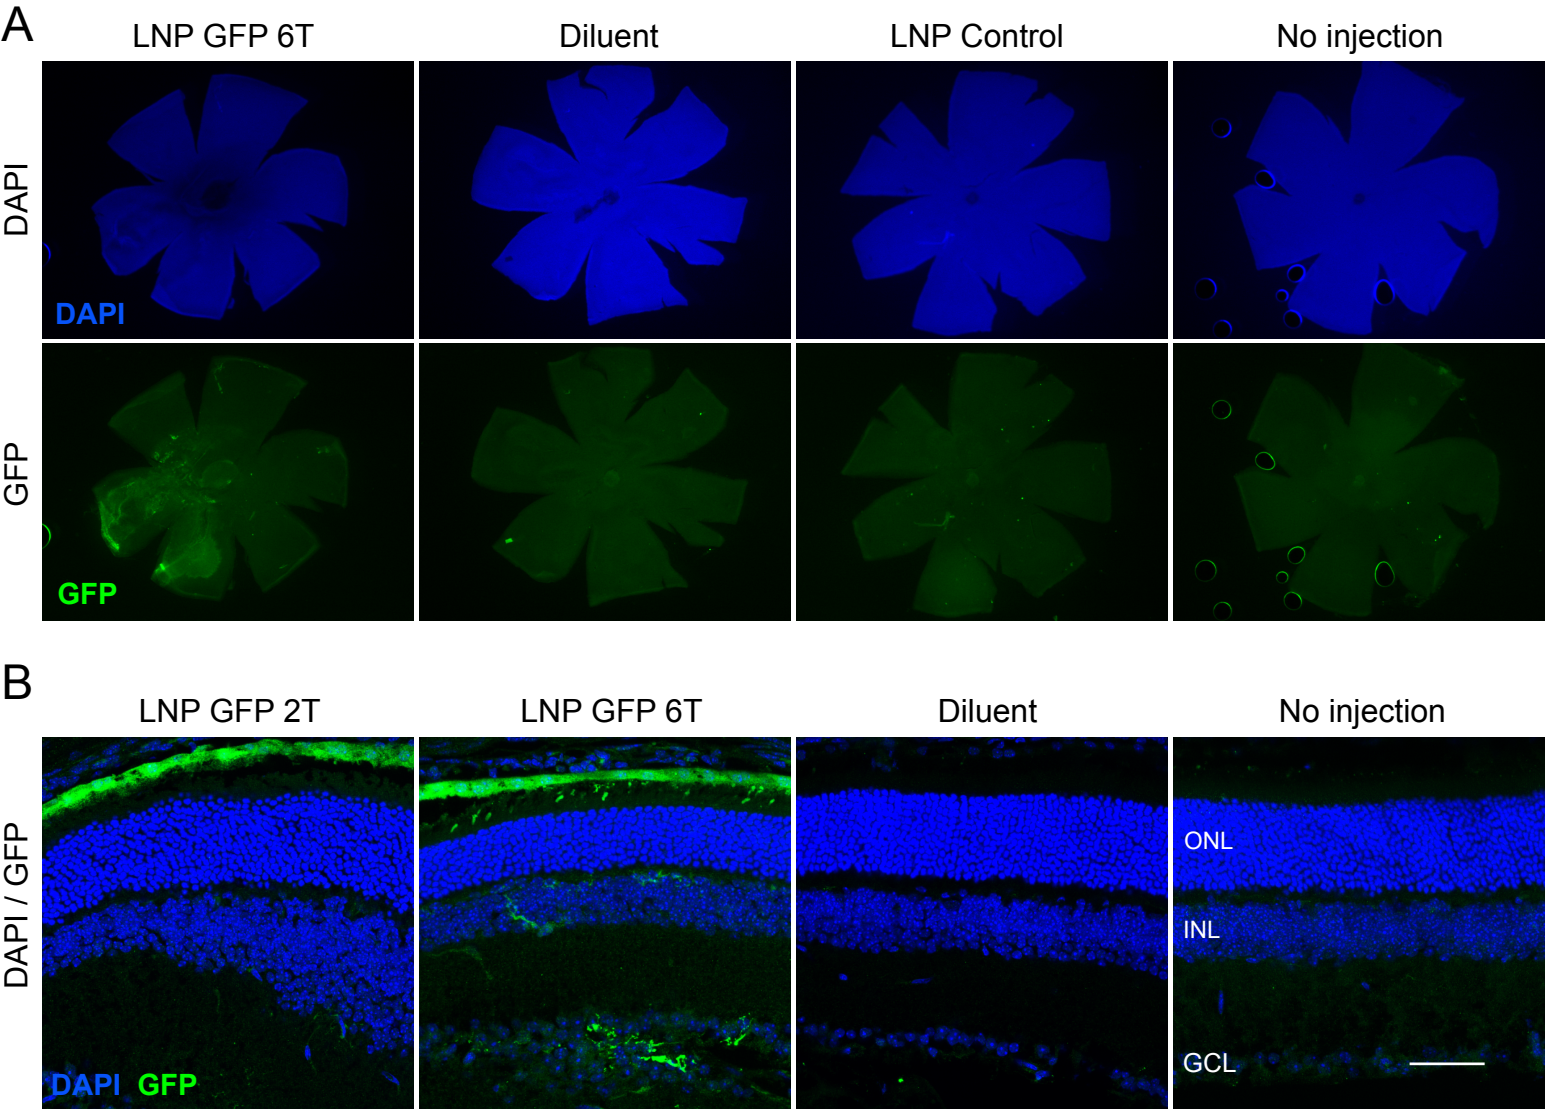

Supplementary Figure 1. Comparison of anti-GFP immunofluorescence across LNP GFP injected and control retinas. (A) Anti-GFP immunofluorescence was visualized in flatmounted adult mouse retinas using DAPI (blue) and anti-GFP immunostaining (green) of mouse retinas injected with LNP EGFP 6T, 1xPBS (Diluent), or LNP CRE-recombinase (Control), and of uninjected retinas (No injection). (B) Anti-GFP immunofluorescence was visualized in cross sections of adult mouse retinas using DAPI and anti-GFP immunostaining of mouse retinas injected with LNP GFP 2T, LNP GFP 6T, 1xPBS (Diluent), and of uninjected retinas (No injection). (scale bar: 50  $\mu$ m)
