# Supplementary material for: Lipid Nanoparticle-Mediated Delivery of mRNA Into the Mouse and Human Retina and Other Ocular Tissues
Source: PubMed Central journal article supplement — Transl Vis Sci Technol. 2024 Jul 9;13(7):7. doi: 10.1167/tvst.13.7.7 (PMC11235142; doi:10.1167/tvst.13.7.7), 2024-07-09
Supplement: tvst-13-7-7_s002.pdf [file tvst-13-7-7_s002.pdf]

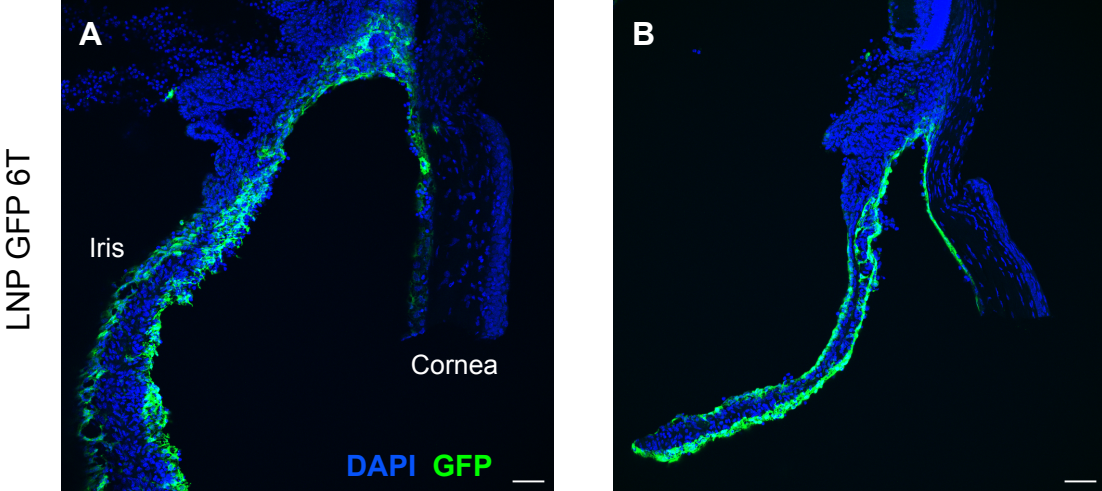

Supplementary Figure 2. EGFP mRNA LNPs transfect the cornea and iris. (A) EGFP is expressed outside the retina in the cornea, iris, and trabecular meshwork in the iridocorneal angle 48 hours after intravitreal injection with EGFP mRNA encapsulated in 6T LNP. (B) Similarly, EGFP is expressed in the cornea, iris, and trabecular meshwork under the same experimental conditions as (A). Images shown are representative of at least 3 retinas and are MIPs (scale bar: 50  $\mu$ m).
