# Supplementary material for: Lipid Nanoparticle-Mediated Delivery of mRNA Into the Mouse and Human Retina and Other Ocular Tissues
Source: PubMed Central journal article supplement — Transl Vis Sci Technol. 2024 Jul 9;13(7):7. doi: 10.1167/tvst.13.7.7 (PMC11235142; doi:10.1167/tvst.13.7.7), 2024-07-09
Supplement: tvst-13-7-7_s003.pdf [file tvst-13-7-7_s003.pdf]

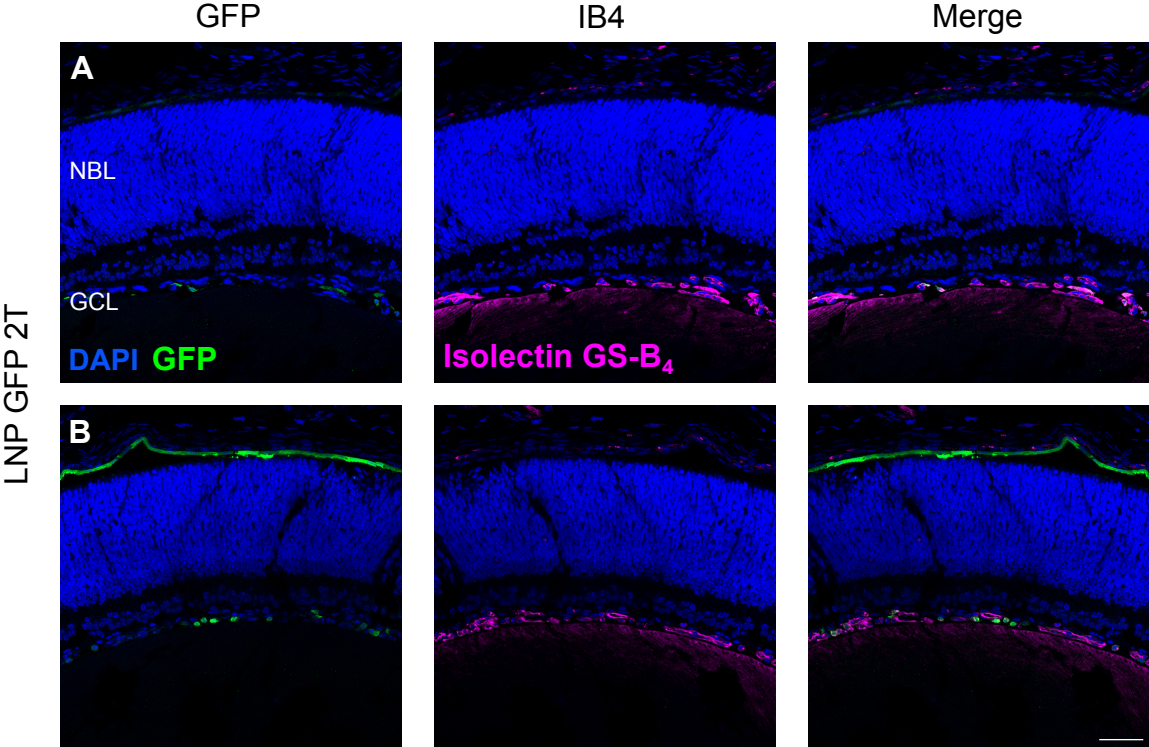

Supplementary Figure 3. EGFP is expressed in perivascular and RPE cells in the neonatal mouse retina. Intravitreal injections of mouse pups (P0) were performed to deliver EGFP mRNA 2T LNPs. Retinas were harvested after 24 hours. (A) EGFP is co-expressed in the GCL near endothelial cells, labelled with Isolectin GS-B<sub>4</sub>. (B) EGFP is additionally expressed in the RPE region of the developing retina. Images shown are representative of at least 3 retinas and are MIPs (scale bar: 50  $\mu$ m).
